# Supplementary material for: Heterometallic complexes combining [MnIII(salpn)]+ and [Fe(CN)6]4− units as the products of reactions between [MnIII(salpn)(H2O)C(CN)3] and [Fe(CN)6]3−/4−
Source: Royal Society of Chemistry journal article supplement (doi:10.1039/c4nj00427b), 2014-01-01
Supplement: c4nj00427b1.pdf [file c4nj00427b1.pdf]

## Electronic Supplementary Information

### Heterometallic complexes combining $[\text{Mn}^{\text{III}}(\text{salpn})]^+$ and $[\text{Fe}(\text{CN})_6]^{4-}$ units as the products of reactions between $[\text{Mn}^{\text{III}}(\text{salpn})(\text{H}_2\text{O})\text{C}(\text{CN})_3]$ and $[\text{Fe}(\text{CN})_6]^{3-/4-}$

Vyacheslav A. Kopotkov,<sup>a\*</sup> Eduard B. Yagubskii,<sup>a\*</sup> Sergey V. Simonov,<sup>b</sup> Leokadiya V. Zorina,<sup>b\*</sup> Denis V. Starichenko,<sup>c</sup> Alexander V. Korolyov,<sup>c</sup> Vladimir V. Ustinov<sup>c</sup> and Yurii N. Shvachko<sup>c,d\*</sup>

<sup>a</sup> Institute of problems of Chemical Physics, Chernogolovka, Moscow District, Academician Semenov av. 1, 142432 Russian Federation. E-mail: yagubski@icp.ac.ru; Fax: +7 496-5225636; Tel: +7 495-9935707

<sup>b</sup> Institute of Solid State Physics, Chernogolovka, Moscow District, Academician Ossipyan str. 2, 142432 Russian Federation. E-mail: zorina@issp.ac.ru; Fax: +7 496-5228160; Tel: +7 496-5221982

<sup>d</sup> Institute of Metal Physics, S. Kovalevskaya st. 18, 620990 Ekaterinburg, Russian Federation. Fax: +7 343-3745244; Tel: +7 343-3740230

<sup>d</sup> Department of Mathematics, University of California, Davis, CA 95616, USA. E-mail: yshvachko@ucdavis.edu; Fax: +7 343-3745244; Tel: +7 343-3740230

### Crystal structures

$[\{\text{Mn}(\text{salpn})(\text{H}_2\text{O})\}_2\{\text{Mn}(\text{salpn})(\text{H}_2\text{O})_{0.7}(\text{CH}_3\text{OH})_{0.3}\}_2\text{Fe}(\text{CN})_6]n \cdot (\text{H}_2\text{O}/\text{CH}_3\text{OH})$  (**2**).

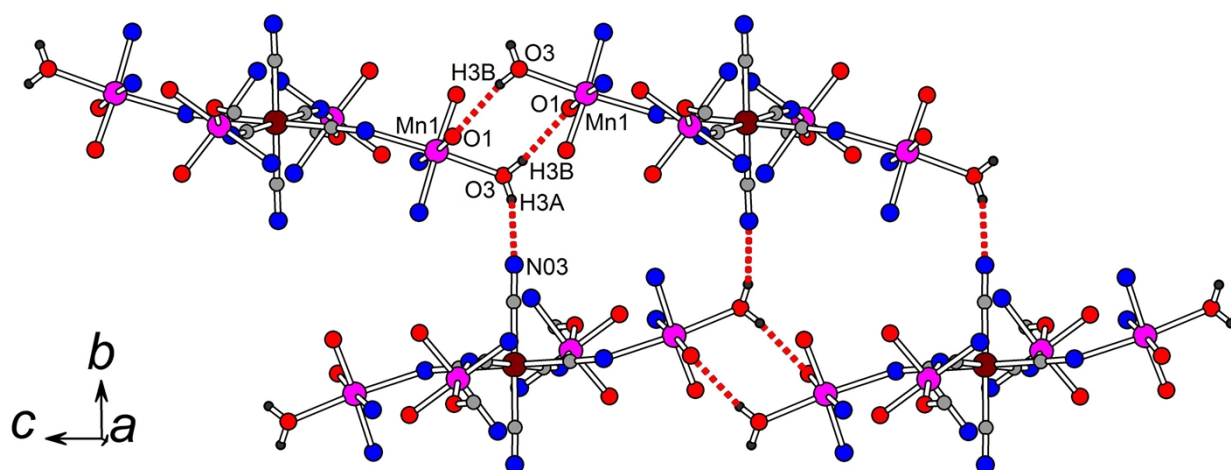

**Figure S1.** Packing diagram and hydrogen bonding within the *bc* layer in the structure of **2**. The non-coordinated atoms of salpn ligand are omitted for clarity. Geometry of hydrogen D-H...A bonds (H...A, D-A distances and D-H...A angle): O3-H3B...O1 2.16, 2.914(3) Å, 159.5(1)°; O3-H3A...N03 2.06, 2.815(4) Å, 163.2(1)°.

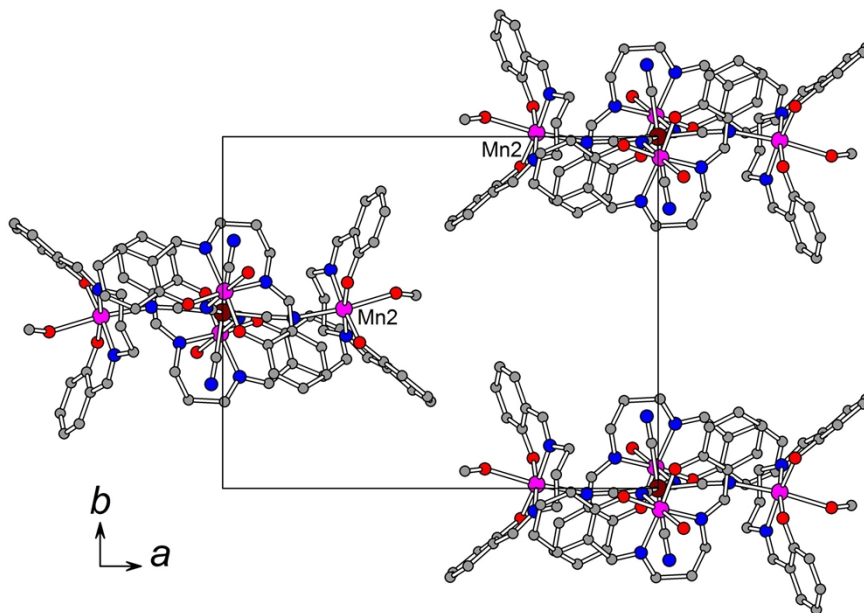

Figure S2. Packing mode of adjacent *bc* layers in **2**.

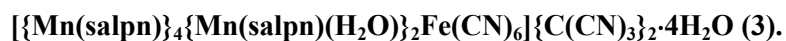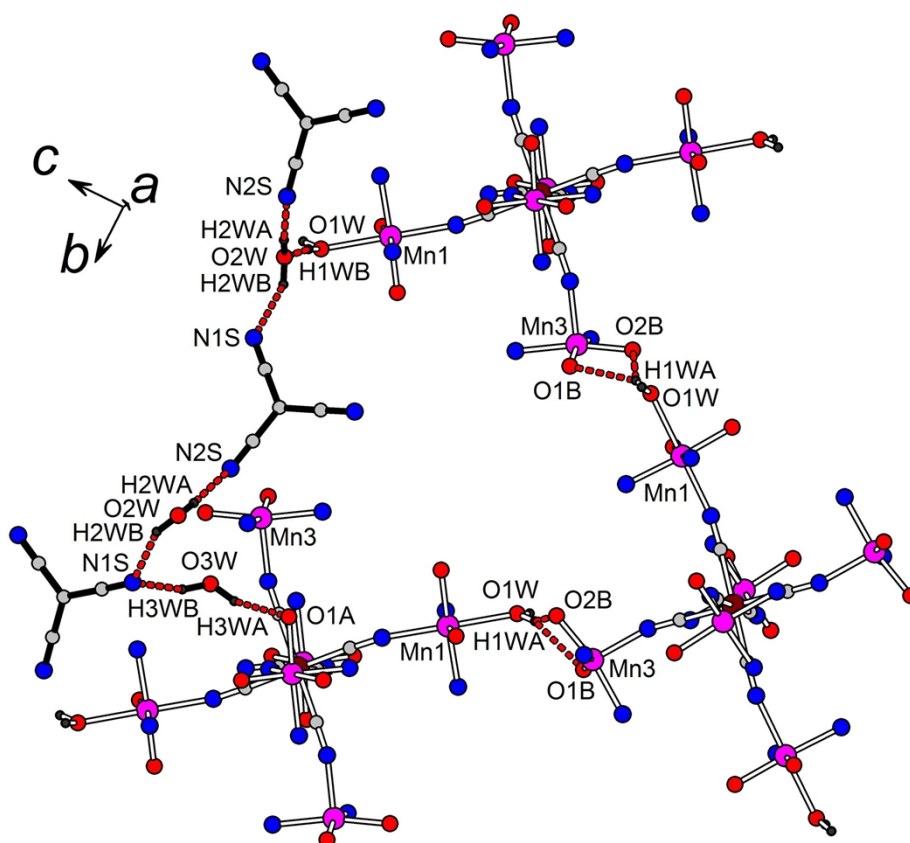

Figure S3. Hydrogen bonding in **3**. H...O and H...N contacts are shown by red dashed lines, the non-coordinated atoms of salpn ligands are omitted for clarity. Geometry of hydrogen D-H...A bonds (H...A, D-A distances and D-H...A angle): O1W-H1WA...O1B 2.32, 3.108(3) Å, 145.7(2)°; O1W-H1WA...O2B 2.31, 3.115(4) Å, 148.4(2)°; O1W-H1WB...O2W 1.89, 2.782(4) Å, 172.4(2)°; O2W-H2WA...N2S 2.10, 2.996(5) Å, 173.8(2)°; O2W-H2WB...N1S 2.16, 2.965(6) Å, 148.3(2)°; O3W-H3WA...O1A 2.03, 2.939(7) Å, 155.1(4)°; O3W-H3WB...N1S 1.96, 2.861(9) Å, 154.5(4)°.

## Additional structure refinement details for 2:

In **2**, salpn moiety of the Mn(2) unit is disordered between two positions with nearly 2/3 and 1/3 occupancies related by  $\sim 25^\circ$  rotation about  $N_{\text{cyano}}\text{-Mn2}$  axis (Fig. S4). Propylene group of another salpn is disordered between two sites of 0.6/0.4 occupancy. Only major positions are shown in Figures 1 and S2. Non-coordinated water and methanol molecules were not localized in **2** and their contribution into electronic density was subtracted by PLATON/SQUEEZE procedure; two free cavities of  $118 \text{ \AA}^3$  per unit cell, each containing 29e, were found. After SQUEEZE, only three partially occupied water sites were localized near disordered salpn units and included into refinement.

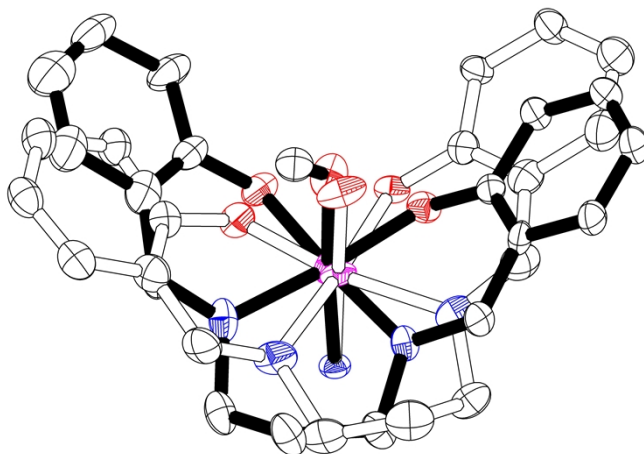

**Figure S4.** Molecular disorder of the  $\{\text{Mn}^{\text{III}}(\text{salpn})(\text{H}_2\text{O})_{0.7}(\text{CH}_3\text{OH})_{0.3}\}$  moiety in the complex **2** (30% ellipsoid probability, H-atoms are omitted for clarity, black bonds are drawn for major position with  $\sim 2/3$  occupancy).

## Numerical simulations of the magnetic susceptibility of 3.

The calculated values of spin susceptibility for four magnetic moments  $S=2$  with  $g=1.94$  and several  $D_{\text{PM}}$  parameters from 0 to  $-2.0 \text{ cm}^{-1}$  ( $4\chi_p(T)$ ) were subtracted from the experimental  $\chi(T)$  data points for **3**. In fact, the  $D$ -parameters for the ions in square pyramidal Mn(3), Mn(3\*\*) co-ordinations could be omitted. We did calculations both for two and for four  $D_{\text{PM}}$  parameters. The resulting datasets are presented in Fig. S5, as orange ( $D=0 \text{ cm}^{-1}$ ), blue ( $D=-0.50 \text{ cm}^{-1}$ ) and green ( $D=-1.00 \text{ cm}^{-1}$ ) circles. The obtained points were simulated by using the Heisenberg–Van Vleck model for the exchange-coupled dimer with two independent parameters:  $D$  and  $J$ . The  $g$ -factor was set 1.94. The plot indicates that ZFS parameters for the paramagnetic Mn<sup>III</sup> moments do not affect the total magnetic susceptibility above 5 K in the reasonable range of  $D$ .

A good fit in the range  $10 \text{ K} < T < 300 \text{ K}$  was obtained at  $J=0.64 \text{ cm}^{-1}$  for all  $|D| \leq 4.0 \text{ cm}^{-1}$ . On contrary, at temperatures  $T < 10 \text{ K}$  the better agreement required higher values of  $|D|$ . The acceptable fitting was found for  $D=-8.0 \text{ cm}^{-1}$ , which is beyond reasonable values and ruins agreement at higher temperatures.

On the next step, we varied  $J$  parameter while the  $D$  values were fixed. In the Fig. S6 we show that even 15% change of  $J$  immediately induces an unacceptable discrepancy at  $T > 10 \text{ K}$ .

Thus, the value of  $J=0.64 \text{ cm}^{-1}$  was determined with good accuracy. A compromise solution for  $D$  parameter over the entire temperature range was reached at  $-4.0 < D < -3.0$ , *i.e.*  $D=-3.5 \pm 0.5 \text{ cm}^{-1}$ .

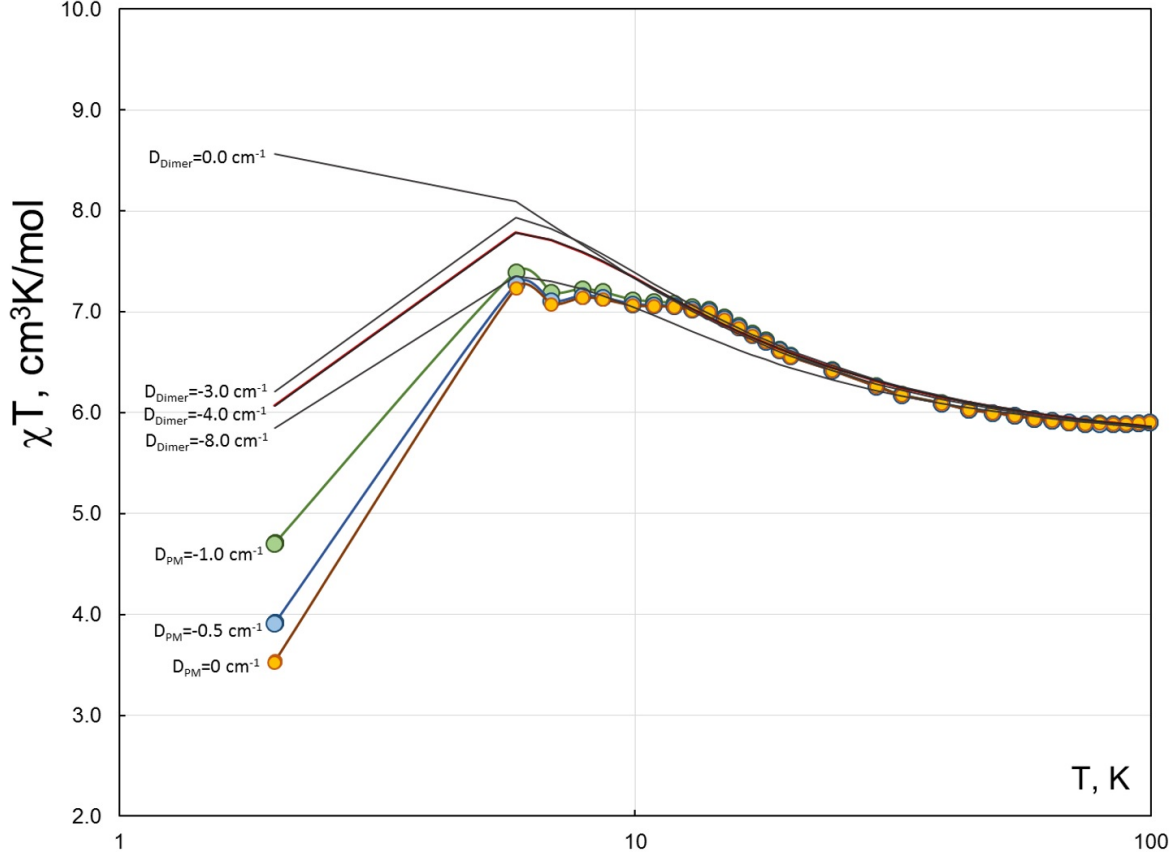

**Figure S5.** Dimer contribution to the magnetic susceptibility extracted from the experiment by subtraction of the paramagnetic response of 4  $S=2$  moments with various  $D$ : orange ( $D=0 \text{ cm}^{-1}$ ), blue ( $D=-0.5 \text{ cm}^{-1}$ ) and green ( $D=-1.0 \text{ cm}^{-1}$ ). Solid dark lines are fittings by the Heisenberg–Van Vleck model with  $J=0.64 \text{ cm}^{-1}$  and  $D=0; -3.0; -4.0; -8.0 \text{ cm}^{-1}$ .

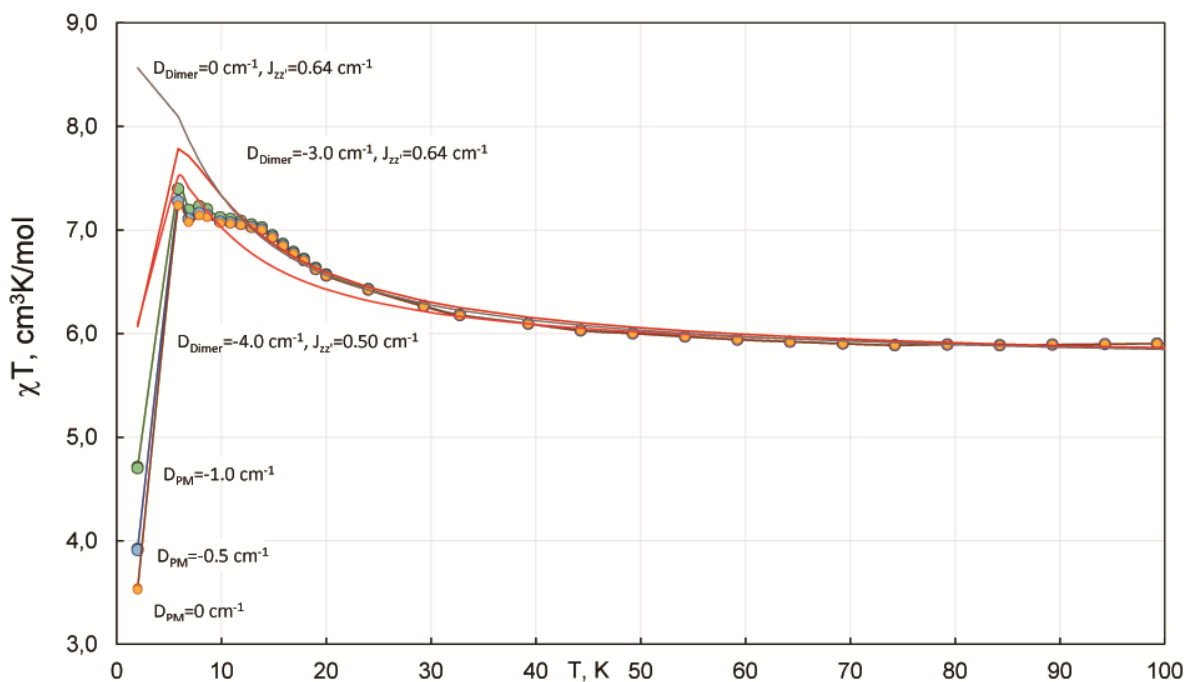

**Figure S6.** Comparison of the simulations of the dimer contribution to the magnetic susceptibility by variation of  $J$ : red line -  $J=0.50 \text{ cm}^{-1}$  compare to dark-red  $0.64 \text{ cm}^{-1}$ . Difference between grey line ( $D=0 \text{ cm}^{-1}$ ) and dark-red line ( $D=-3.0 \text{ cm}^{-1}$ ) shows magnitude of variation of the  $\chi T$  product while changing  $D$  parameter.
